# Supplementary figures and images for: Highly pathogenic avian influenza virus H5N1 clade 2.3.4.4b in wild rats in Egypt during 2023
Source: PubMed Central journal article supplement — Emerg Microbes Infect. 2024 Aug 28;13(1):2396874. doi: 10.1080/22221751.2024.2396874 (PMC11382695; doi:10.1080/22221751.2024.2396874), 2024-08-28

PB2

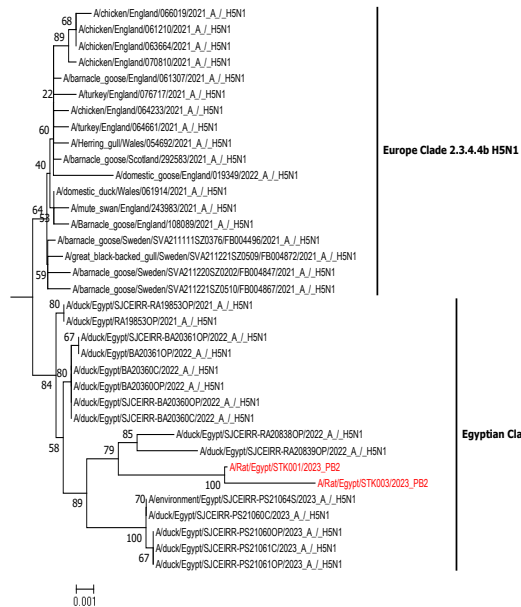

PB1

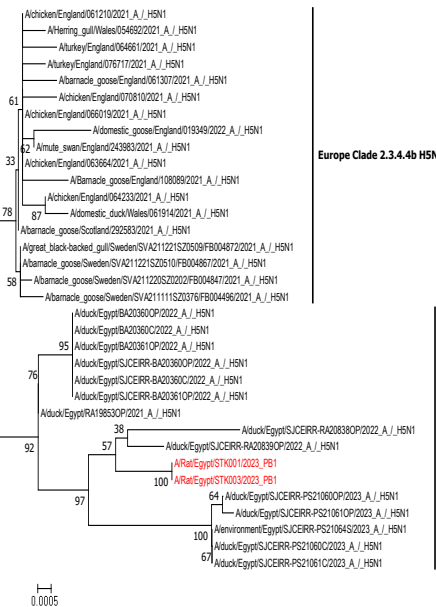

PA

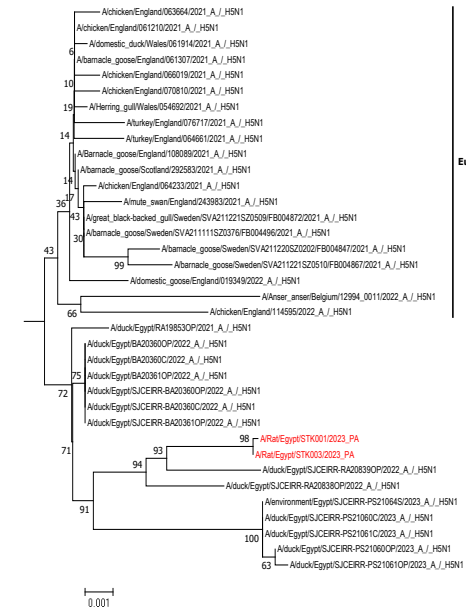

NP

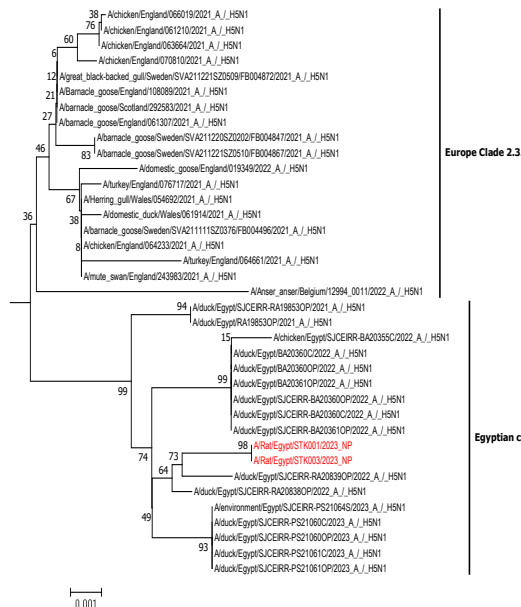

M

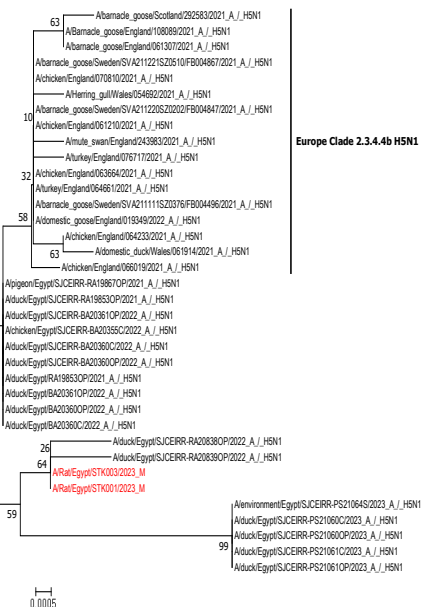

NS

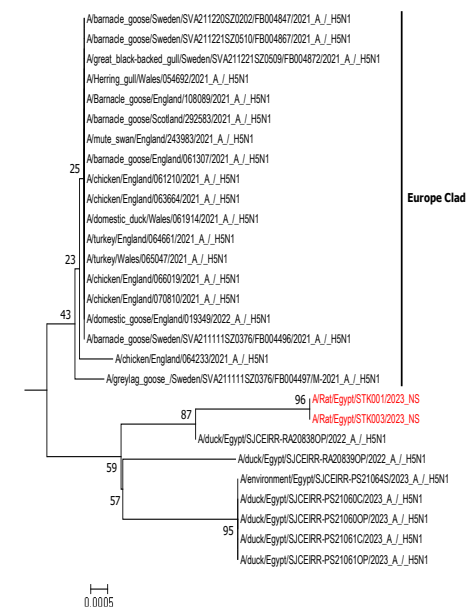

Supplement: TEMI_A_2396874_SM6191.pdf [file TEMI_A_2396874_SM6191.pdf]
